# Supplementary material
Source: PubMed Central journal article supplement (PMC4546924)
Supplement: NIHMS704131-supplement-1.pdf [file NIHMS704131-supplement-1.pdf]

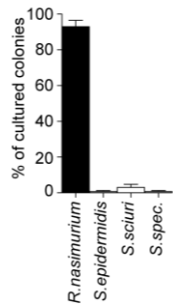

**Figure S1. Identification of commensals and unaltered response in mono reconstituted mice**

(A) Bacterial cultures were obtained by swabbing the ears of  $\Delta$ LC and control mice in our colony. The identity of each colony was determined by 16S rDNA sequencing. No differences were observed between mouse genotype and are shown as the percentage of each species found across all samples.

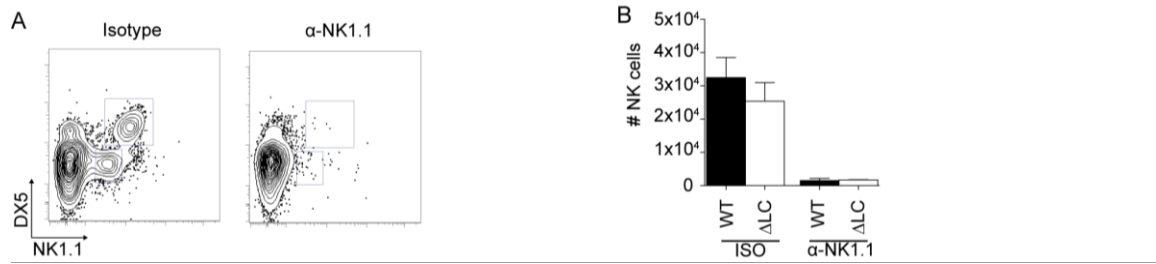

**Figure S2. Antibody depletion of NK cells**

(A) Antibody depletion with anti-NK1.1 antibody leads to depletion of NK1.1+ DX5+ and NK1.1+ DX5- NK cells. (B) Numeric evaluating of NK cell depletion efficacy after NK1.1 depletion.

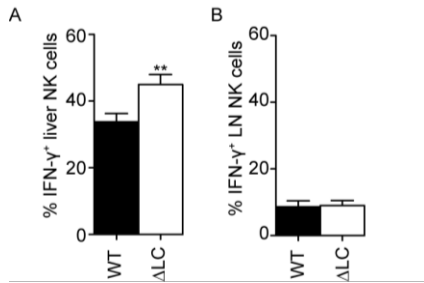

**Figure S3. Increased IFN $\gamma$  production by liver NK cells in  $\Delta$ LC mice.**

Cohorts (n=5) of WT and  $\Delta$ LC mice were treated i.v. with 20ug LPS.. Four hours later, liver (A) and skin draining lymph nodes (B) were harvested. Expression of IFN- $\gamma$  by CD3<sup>-</sup>, NK1.1<sup>+</sup> NK cells was determined by intracellular flow cytometry. \*\* p<0.01.
